# Supplementary material for: Highly efficient red-emitting Ca2YSbO6:Eu3+ double perovskite phosphors for warm WLEDs
Source: Royal Society of Chemistry journal article supplement (doi:10.1039/c9ra03410b), 2019-01-01
Supplement: c9ra03410b1.pdf [file c9ra03410b1.pdf]

## Supporting information

### Highly efficient red-emitting $\text{Ca}_2\text{YSbO}_6:\text{Eu}^{3+}$ double perovskite phosphors for warm WLEDs

Meijiao Liu<sup>a</sup>, Biao Shen<sup>b</sup>, Keyuan Wang<sup>b</sup>, Jiasong Zhong<sup>b,\*</sup>, Daqin Chen<sup>c,\*</sup>

<sup>a</sup> Department of Chemistry, Zhejiang Sci-Tech University, Hangzhou 310018, China

<sup>b</sup> College of Materials and Environmental Engineering, Hangzhou Dianzi University, Hangzhou 310018, China

<sup>c</sup> College of Physics and Energy, Fujian Normal University, Fuzhou, 350117, P. R. China

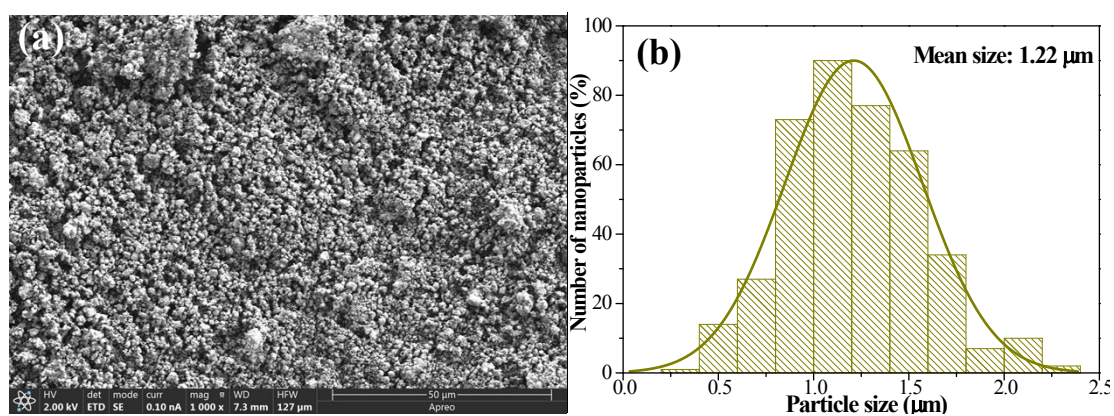

**Fig. S1** (a) SEM image of  $\text{Ca}_2\text{Y}_{0.3}\text{SbO}_6:0.7\text{Eu}^{3+}$  sample and (b) the corresponding size distribution image.

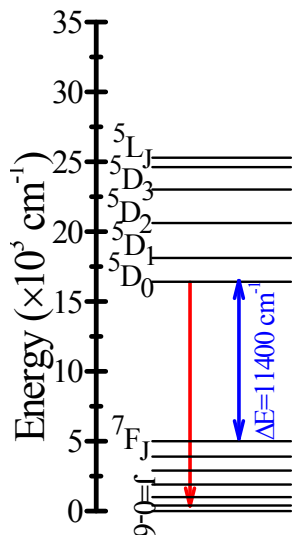

**Fig. S2** The schematic energy level diagram of  $\text{Eu}^{3+}$ .

**Table S1** Lattice parameters of  $\text{Ca}_2\text{YSbO}_6:0.1\text{Eu}^{3+}$  sample

| Formula               | $\text{Ca}_2\text{YSbO}_6:0.1\text{Eu}^{3+}$ |
|-----------------------|----------------------------------------------|
| Crystal system        | Monoclinic                                   |
| Space group           | $P2_1/n$ (14)                                |
| $a$ (Å)               | 5.611                                        |
| $b$ (Å)               | 5.806                                        |
| $c$ (Å)               | 8.057                                        |
| $V$ (Å <sup>3</sup> ) | 262.48                                       |
| $\text{Chi}^2$        | 1.845                                        |
| $R_p$                 | 8.63%                                        |
| $R_{wp}$              | 11.29%                                       |
| $R_e$                 | 6.12%                                        |
